# Supplementary material
Source: MDPI journal article supplement (https://www.mdpi.com/2073-445X/13/3/272)
Supplement: s1 [file s1]

## Supplemental Material

**Supplementary Table S1.** Woody plant species composition in the assessed model rural settlements

| Model area | Value assessed | Identification of the woody plant species composition in the model areas (M1, M2, M3) based on A) field mapping and definition of species origin, B) the Potential Natural Vegetation (PNV) and the surrounding forest types and C) identified overlap between A and B – occurring species in accordance with the PNV.                                                                                                                                                                                                                                                                                                                                                                                                                                                                                                                                                                                                                                                                                                                                                                                                               |
|------------|----------------|--------------------------------------------------------------------------------------------------------------------------------------------------------------------------------------------------------------------------------------------------------------------------------------------------------------------------------------------------------------------------------------------------------------------------------------------------------------------------------------------------------------------------------------------------------------------------------------------------------------------------------------------------------------------------------------------------------------------------------------------------------------------------------------------------------------------------------------------------------------------------------------------------------------------------------------------------------------------------------------------------------------------------------------------------------------------------------------------------------------------------------------|
| M1         | A              | <b>Original domestic tree species (8 species / 96 woody plants):</b> 6x <i>Acer pseudoplatanus</i> L., 2x <i>Acer platanoides</i> L., 3x <i>Betula pendula</i> L., 61x <i>Carpinus betulus</i> 'Fastigiata', 3x <i>Fraxinus excelsior</i> L., 14x <i>Quercus robur</i> 'Fastigiata', 6x <i>Tilia cordata</i> Mill., 1x <i>Tilia platyphyllos</i> L.                                                                                                                                                                                                                                                                                                                                                                                                                                                                                                                                                                                                                                                                                                                                                                                  |
|            |                | <b>Introduced domesticated tree species (6 species / 61 woody plants):</b> 23x <i>Aesculus hippocastanum</i> L., 2x <i>Acer saccharinum</i> L., 21x <i>Juglans regia</i> L., 1x <i>Negundo aceroides</i> Moench, 1x <i>Sophora japonica</i> L., 13x <i>Thuja occidentalis</i> 'Smaragd'                                                                                                                                                                                                                                                                                                                                                                                                                                                                                                                                                                                                                                                                                                                                                                                                                                              |
|            |                | <b>Introduced partially domesticated shrub species (1 species / 13 woody plants):</b> 13x <i>Photinia x fraseri</i> 'Red Robin'                                                                                                                                                                                                                                                                                                                                                                                                                                                                                                                                                                                                                                                                                                                                                                                                                                                                                                                                                                                                      |
|            | B              | <b>Willow-poplar forests in the floodplains of large rivers</b> (softwood floodplain forests), oak and cerium-oak forests, ash-elm-oak forests in the basins of large rivers (hardwood floodplain forests), Carpathian oak-hornbeam forests.<br><b>Woody plant species that may occur in the landscape based on the surrounding forest types:</b> <i>Acer campestre</i> L., <i>Acer tataricum</i> L., <i>Carpinus betulus</i> L., <i>Cerasus avium</i> (L.) Moench., <i>Corylus avellana</i> L., <i>Cornus mas</i> L., <i>Crataegus monogyna</i> Jacq., <i>Fagus sylvatica</i> L., <i>Fraxinus angustifolia</i> Vahl, <i>Fraxinus angustifolia</i> Vahl subsp. <i>danubialis</i> , <i>Fraxinus excelsior</i> L., <i>Ligustrum vulgare</i> L., <i>Padus avium</i> Mill., <i>Populus alba</i> L., <i>Populus nigra</i> L., <i>Prunus spinosa</i> L., <i>Quercus robur</i> L., <i>Quercus petraea</i> (Mattusch.) Liebl. agg., <i>Quercus cerris</i> L., <i>Salix alba</i> L., <i>Sorbus torminalis</i> (L.) Crantz, <i>Swida sanguinea</i> (L.) Opiz., <i>Tilia cordata</i> Mill., <i>Ulmus laevis</i> Pall., <i>Ulmus minor</i> Mill. |
| M2         | C              | <i>Carpinus betulus</i> L.; <i>Fraxinus excelsior</i> L.; <i>Quercus robur</i> L.; <i>Tilia cordata</i> Mill. <b>(4 species)</b>                                                                                                                                                                                                                                                                                                                                                                                                                                                                                                                                                                                                                                                                                                                                                                                                                                                                                                                                                                                                     |
|            | A              | <b>Original domestic tree species (8 species / 47 woody plants):</b> 6x <i>Acer platanoides</i> 'Globosum', 1x <i>Carpinus betulus</i> L., 26x <i>Fraxinus ornus</i> 'Meczek', 3x <i>Fraxinus excelsior</i> 'Altena', 2x <i>Tilia cordata</i> 'Rancho', 4x <i>Tilia cordata</i> 'Roelvo', 4x <i>Tilia cordata</i> Mill., 1x <i>Tilia platyphyllos</i> Scop.                                                                                                                                                                                                                                                                                                                                                                                                                                                                                                                                                                                                                                                                                                                                                                          |
|            |                | <b>Introduced domesticated tree species (5 species / 14 woody plants):</b> 2x <i>Aesculus hippocastanum</i> L., 4x <i>Robinia pseudoacacia</i> 'Umbraculifera', 3x <i>Robinia pseudoacacia</i> L., 2x <i>Thuja occidentalis</i> 'Smaragd', 3x <i>Thuja occidentalis</i> 'Malonyana'                                                                                                                                                                                                                                                                                                                                                                                                                                                                                                                                                                                                                                                                                                                                                                                                                                                  |
|            |                | <b>Potentially introduced (rare) shrub species (1 species / 3 woody plants) –</b> 3x <i>Juniperus x media</i> 'Pfitzeriana Aurea'                                                                                                                                                                                                                                                                                                                                                                                                                                                                                                                                                                                                                                                                                                                                                                                                                                                                                                                                                                                                    |
|            | B              | <b>Ash-elm-oak forests in the basins of large rivers</b> (hardwood floodplain forests), lowland hygrophilous oak-hornbeam forests, alder forests in the floodplains of submountain and mountain streams, Carpathian oak-hornbeam forests.<br><b>Woody plant species that may occur in the landscape based on the surrounding forest types:</b> <i>Acer campestre</i> L., <i>Acer pseudoplatanus</i> L., <i>Acer tataricum</i> L., <i>Alnus glutinosa</i> (L.) Gaertn., <i>Alnus incana</i> (L.) Moench., <i>Carpinus betulus</i> L., <i>Cerasus avium</i> (L.) Moench., <i>Corylus avellana</i> L., <i>Crataegus monogyna</i> Jacq., <i>Fagus sylvatica</i> L., <i>Fraxinus angustifolia</i> Vahl subsp. <i>danubialis</i> , <i>Fraxinus excelsior</i> L., <i>Padus avium</i> Mill., <i>Populus nigra</i> L., <i>Quercus robur</i> L., <i>Quercus petraea</i> (Mattusch.) Liebl. agg., <i>Ribes uva-crispa</i> L., <i>Tilia cordata</i> Mill., <i>Sambucus nigra</i> L., <i>Sorbus torminalis</i> (L.) Crantz, <i>Swida sanguinea</i> (L.) Opiz., <i>Ulmus laevis</i> Pall., <i>U. minor</i> Mill., <i>Viburnum opulus</i> L.        |
| M3         | C              | <i>Carpinus betulus</i> L.; <i>Fraxinus excelsior</i> L.; <i>Tilia cordata</i> Mill. <b>(3 species)</b>                                                                                                                                                                                                                                                                                                                                                                                                                                                                                                                                                                                                                                                                                                                                                                                                                                                                                                                                                                                                                              |
|            | A              | <b>Original domestic tree species (9 species / 30 woody plants):</b> 4x <i>Acer campestre</i> L., 5x <i>Betula pendula</i> Roth, 5x <i>Fraxinus excelsior</i> L., 2x <i>Picea abies</i> (L.) H. Karst., 1x <i>Populus nigra</i> L., 1x <i>Salix alba</i> L., 3x <i>Tilia platyphyllos</i> Scop., 8x <i>Tilia cordata</i> Mill., 1x <i>Prunus domestica</i> L.                                                                                                                                                                                                                                                                                                                                                                                                                                                                                                                                                                                                                                                                                                                                                                        |

---

**Introduced domesticated tree species (4 species / 14 woody plants):** 2x *Pinus nigra* (J.F.?) Arn., 9x *Pyrus communis* L. emend. Burgsd., 1x *Thuja plicata* 'Zebrina', 2x *Thuja occidentalis* 'Malonyana'

**Original domestic shrub species (5 species / 54 woody plants):** 15x *Corylus avellana* L., 12x *Clematis vitalba* L., 7x *Rosa canina* L., 2x *Rubus idaeus* L., 18x *Swida sanguinea* (L.) Opiz.

**Introduced domesticated shrub species (5 species / 18 woody plants):** 2x *Forsythia x intermedia* 'Minigold', 1x *Chamaecyparis lawsoniana* 'Alumii', 3x *Chaenomeles japonica* (Thunb.) Lindl., 10x *Prunus laurocerasus* 'Nana', 2x *Spiraea x vanhouttei* 'Renaissance'

---

**Carpathian oak-hornbeam forests, oak-cerium forests, ash-alder submountain floodplain forests.**

**Woody plant species that may occur in the landscape based on the surrounding forest types:**

**B**

*Acer campestre* L., *Acer pseudoplatanus* L., *Alnus glutinosa* (L.) Gaertn., *Alnus incana* (L.) Moench., *Cerasus avium* (L.) Moench., *Carpinus betulus* L., *Corylus avellana* L., *Cornus mas* L., *Fagus sylvatica* L., *Fraxinus excelsior* L., *Ligustrum vulgare* L., *Lonicera xylosteum* L., *Quercus petraea* agg., *Quercus cerris* L., *Quercus robur* agg., *Ribes uva-crispa* L., *Sambucus nigra* L., *Swida sanguinea* (L.) Opiz., *Tilia cordata* Mill., *Padus avium* Mill., *Prunus spinosa* L., *Rubus sp.* L., *Viburnum opulus* L.

---

**C**

*Acer campestre* L.; *Corylus avellana* L.; *Fraxinus excelsior* L.; *Tilia cordata* Mill.; *Rubus sp.* L.; *Swida sanguinea* (L.) Opiz. **(6 species)**

---

<sup>1</sup> M1, M2, M3 – model areas, A – identified and documented woody plant species, number of species, number of woody plants, B – Potential Natural Vegetation, C – existing tree species in line with the potential natural vegetation.
